# Supplementary material for: Prevalence and associated characteristics of recurrent non-specific low back pain in Zimbabwean adolescents: a cross-sectional study
Source: PubMed Central journal article supplement (PMC4246475; doi:10.1186/1471-2474-15-381), 2014-11-19

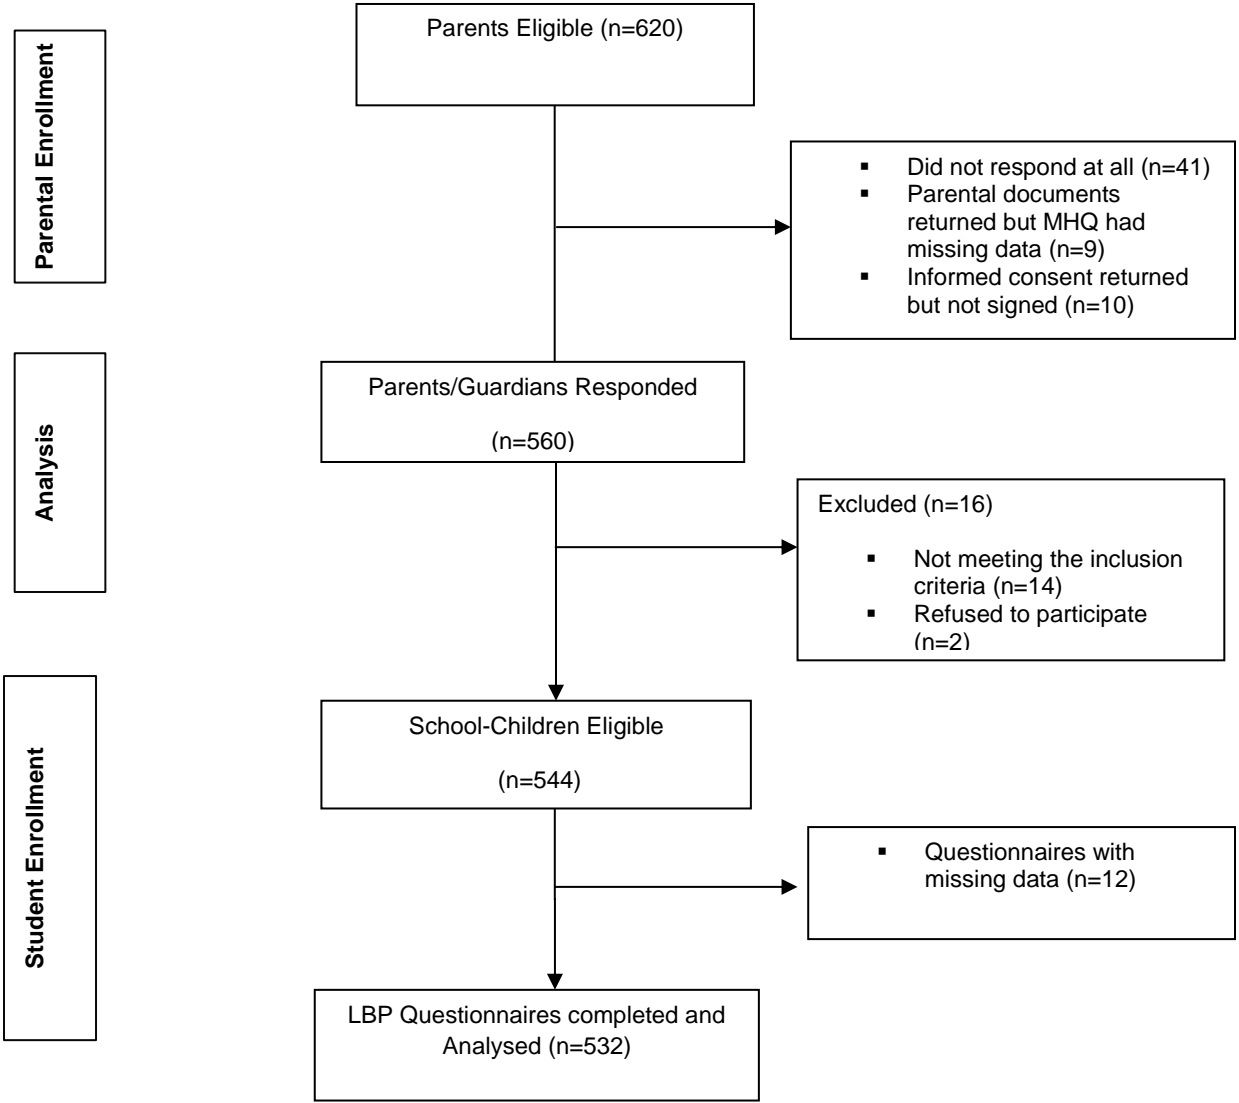

Supplement: 12891_2014_2312_MOESM1_ESM.pdf [file 12891_2014_2312_MOESM1_ESM.pdf]
